# Supplementary material for: Computational Method for k-Distance Limited Minimum Feedback Vertex Set and Its Application to Biological Networks
Source: Research Square preprint supplement (doi:10.21203/rs.3.rs-4023115/v1), 2024-03-29
Supplement: Supplementary file 1 [file 2425bb3a9ee9c4c63a2782ce.xlsx]

## Sheet: Sheet1
N (random graph)	Max. k (m=2)	Max. k (any m)		N (Scale-free graph)	Max. k
100	14.5	9.54		300	6.78
200	17.26	16.41		1000	8.51
300	18.75	19.85		3000	10.27
400		29.22
