# Supplementary material for: Computational Method for k-Distance Limited Minimum Feedback Vertex Set and Its Application to Biological Networks
Source: Research Square preprint supplement (doi:10.21203/rs.3.rs-4023115/v1), 2024-03-29
Supplement: Supplementary file 2 [file 87dc44e30b971e81872773a7.xlsx]

## Sheet: Sheet1
Method	Number of elements in MFVS or kMFVS	Recall	Precision	F1	p-value
k2MFVS	32	0.114	0.5	0.186	1.74069e-06
k3MFVS	17	0.078	0.647	0.14	2.62067e-06
k4MFVS	15	0.057	0.533	0.103	0.000424751
k5MFVS	10	0.042	0.6	0.08	0.00104367
k6MFVS	10	0.042	0.6	0.08	0.00104367
k7MFVS	9	0.035	0.555	0.067	0.0044683
MFVS	8	0.035	0.625	0.067	0.00224975
