# Supplementary material for: Computational Method for k-Distance Limited Minimum Feedback Vertex Set and Its Application to Biological Networks
Source: Research Square preprint supplement (doi:10.21203/rs.3.rs-4023115/v1), 2024-03-29
Supplement: Supplementary file 3 [file e73d3f5f7b963c266c1a7b53.xlsx]

## Sheet: Sheet1
Network data	Nodes N	Edges M	Oncogene related gene	ASD related gene
RegNetwork	983	3950	140	-
TRRUST v2	2862	8427	199	285
